# Supplementary material for: Dietary Patterns Prior to Pregnancy and Associations with Pregnancy Complications
Source: MDPI journal article supplement (doi:10.3390/nu10070914), 2018-07-17
Supplement: s1 [file s1]

**Supplementary table 1: Food groups and the FFQ items included in them**

| <b>Food group</b>                   | <b>Included items from the FFQ</b>                                                                                            |
|-------------------------------------|-------------------------------------------------------------------------------------------------------------------------------|
| White bread                         | White bread (including bagels, pitta, English muffins, croissants etc.)                                                       |
| Wholemeal bread                     | Wholemeal bread (including wholemeal versions of any bread product)                                                           |
| Cereals                             | 'Bran' breakfast cereals/cereal bars Non-bran breakfast cereals and cereal bars Oatmeal, Cream of Wheat, Other cooked cereals |
| Crackers                            | Crackers, Wholemeal crackers, Rice cakes                                                                                      |
| White rice and pasta                | White Pasta, White Rice, Mixed pasta dishes                                                                                   |
| Cakes, Muffins, and Cookies         | Cakes, Muffins, Pastries, Chocolate cookies, Banana Breads, Sweet Muffins, Dessert Breads, Other fruit breads, Other cookies  |
| Puddings and desserts               | Fruit based puddings, Milk based puddings, Other desserts, Pies, Ice cream, frozen yogurt                                     |
| Full Fat Milk                       | Full Fat Liquid milk (>3.2% M.F.), Homo Milk                                                                                  |
| Reduced Fat Milk                    | 1% Milk, 2% Milk, Powdered Milk, Skim Milk, Soy Milk                                                                          |
| Cream                               | Sour Cream, Cream/half & half                                                                                                 |
| Cheese and cheese sauce             | Cheese, Imitation cheese, Cheese Sauce                                                                                        |
| Yoghurt and Cottage Cheese          | Yoghurt, Cottage Cheese                                                                                                       |
| Eggs and egg dishes                 | Eggs, Omelets, Egg dishes                                                                                                     |
| Full Fat spreads                    | Full-fat spread (>69g fat/100g), Mayonnaise, Butter, Lard                                                                     |
| Reduced Sat. Fat Spreads            | Margarine (including low-fat), Reduced-fat spread (<69g fat/100g), Reduced-fat artificial creamer                             |
| Oils                                | Canola oil, Olive oil, Vegetable oil, Regular artificial Creamer                                                              |
| Poultry                             | Chicken and turkey (not processed)                                                                                            |
| Red meat                            | Pork, Lamb, Beef, Minced meat dishes                                                                                          |
| Processed meat                      | Bacon and gammon, Meat pies, Sausage, Ham and canned meats Luncheon meats, Canned chili                                       |
| Fish and shell-fish                 | White fish, Fish pie, Oily fish, Shell-fish                                                                                   |
| Salad Vegetables excluding tomatoes | Salad, Coleslaw, Cucumber, Arugula Belgium endive/chicory, Green pepper & watercress, Avocado, Olives                         |

|                                 |                                                                                                                                                            |
|---------------------------------|------------------------------------------------------------------------------------------------------------------------------------------------------------|
| Green vegetables                | Spinach, Kale and collards, Sprouts and broccoli, Cabbage and cauliflower, Peas, Zucchini, marrow & leeks, Celery, Artichokes, Asparagus, Brussels sprouts |
| Dark yellow/Orange vegetables   | Carrots, Rutabaga, Yams, Sweet potatoes, Pumpkin, Butternut squash, Winter squash                                                                          |
| Other vegetables                | Sweet corn, Turnip, Parsnips, Onion, Mushrooms, Mixed fresh or frozen vegetables, Seaweed                                                                  |
| Beans and pulses                | Beans, chickpeas, lentils                                                                                                                                  |
| Boiled potatoes                 | Boiled potatoes                                                                                                                                            |
| Fries                           | Fries, Roast potatoes                                                                                                                                      |
| Chips and Popcorn               | Chips, fried snacks, Popcorn, Pretzels                                                                                                                     |
| 100% Fruit and Vegetable Juices | Orange juice, Grapefruit juice, Other fruit juices, Smoothies, Vegetable Juices, Tomato Juice                                                              |
| Whole fruit                     | Apples and pears, Banana, Peaches, plums, apricots, cherries and grapes, Strawberry and raspberry Melon, Pineapple, Mango, Kiwi, Oranges, Grapefruits      |
| Nuts and seeds                  | Nuts and seeds                                                                                                                                             |
| Dried fruit                     | Dried fruit                                                                                                                                                |
| Confectionery                   | Chocolate, Candy, Other confectionery                                                                                                                      |
| Sweet spreads                   | Sweet spreads, Jam                                                                                                                                         |
| Added sugar                     | Added sugar (teaspoons), Coffee syrups, Pancake syrup, Maple syrup                                                                                         |
| High-energy soft drinks         | High sugar drinks, Fizzy drinks, Coke, Energy drinks                                                                                                       |
| Low energy drinks               | Diet sodas, Reduced sugar drinks, Flavoured waters                                                                                                         |
| Tea                             | Tea                                                                                                                                                        |
| Coffee                          | Coffee                                                                                                                                                     |
| Decaffeinated tea               | Decaffeinated tea and herbal tea                                                                                                                           |
| Decaffeinated coffee            | Decaffeinated coffee                                                                                                                                       |
| Wine                            | Wine and fortified wine                                                                                                                                    |
| Nutrition bars and drinks       | Protein and energy bars, Protein drinks                                                                                                                    |
| Pancakes and waffles            | Pancakes, French Toast, Waffles, Crepes                                                                                                                    |
| Tomatoes                        | Tomatoes, Tomato paste, Canned tomatoes, Ketchup, Salsa                                                                                                    |

|                                       |                                              |
|---------------------------------------|----------------------------------------------|
| Pizza and related mixed dishes        | Pizza, Empanadas, Tacos, Burritos, Fajitas   |
| Meat Substitutes and vegetarian foods | Soy Meat-substitutes, Tofu, Vegetarian Foods |
| Beer and hard liquor                  | Beer, Hard liquor (vodka, Scotch, etc.)      |
| Miscellaneous                         | Gravy, Salad dressings, Artificial Sweetener |
| Dumplings and Perogies                | Dumplings, Perogies                          |

**Supplement Table 2:** Associations with gestational diabetes

| Variable             | Odds ratio | 95% confidence intervals | P Value |
|----------------------|------------|--------------------------|---------|
| Pre-pregnancy BMI†   | 2.3        | 1.4, 3.6                 | 0.001   |
| Age (years)          | 1.16       | 1.1, 1.3                 | 0.001   |
| Total physical index | 0.66       | 0.5, 0.9                 | 0.007   |

Forward step-wise logistic regression model. Factors which had a univariate association with gestational diabetes of  $p < 0.2$  were included in the final model: Education (in 2 groups) Ethnicity (in 2 groups), total gestational weight gain, and total daily energy intake (kcal).

†Pre-pregnancy BMI in 3 groups; 1= normal weight, 2 = overweight, 3 = obese.

**Supplement Table3:** Associations with gestational weight gain (GWG) in excess of the IOM guidelines (compared with GWG within the IOM guidelines)

| Variable                   | Odds ratio | 95% confidence intervals | P Value |
|----------------------------|------------|--------------------------|---------|
| Pre-pregnancy BMI†         | 2.2        | 1.8, 2.7                 | <0.001  |
| Education††                | 0.8        | 0.6, 1.1                 | 0.16    |
| Age (years)                | 1.0        | 0.9, 1.0                 | 0.16    |
| Tea & Coffee pattern score | 1.1        | 0.98, 1.3                | 0.07    |

Forward step-wise logistic regression model. Factors which had a univariate association with gestational weight gain (in excess versus within the GWG guidelines) of  $p < 0.2$  were included in the final model: Household income (in 2 groups) and total daily energy intake (kcal).

†Pre-pregnancy BMI in 3 groups; 1= normal weight, 2 = overweight, 3 = obese.

†† Education in 2 groups; 1= >university level, 2= ≥university level

**Supplement Table 4:** Sensitivity analysis showing relationship between ethnicity and dietary pattern scores with and without the individual ethnic groups in the non-Caucasian category associated with the patterns.

| Characteristic                | Healthy pattern | Refined carbohydrate pattern | Beans cheese and salad pattern |
|-------------------------------|-----------------|------------------------------|--------------------------------|
| Ethnicity                     |                 |                              |                                |
| - Caucasian (reference group) | --              | --                           | --                             |
| - Non-Caucasian               | 0.52***         | 0.38***                      | -0.43***                       |
| Ethnicity                     |                 |                              |                                |
| - Caucasian (reference group) | --              | --                           | --                             |
| - Non-Caucasian†              | 0.22*           | 0.21                         | -0.29*                         |

Linear regression models with pattern scores as the outcome variable. Models also adjusted for participant age, education, income, parity, pre-pregnancy BMI, physical activity score and total daily Kcal intake.

\* P <0.05; \*\* P <0.01; \*\*\* P <0.001

†Excluding Chinese, Native American and South East Asian groups in analysis with healthy pattern; Excluding Chinese, Filipino, Korean, Arab and South East Asian groups in analysis with refined carbohydrate pattern; Excluding Chinese, Filipino and South East Asian groups in analysis with beans, cheese and salad pattern
